# Supplementary material for: Crystal structure of bacterial ubiquitin ADP-ribosyltransferase CteC reveals a substrate-recruiting insertion
Source: PubMed Central journal article supplement (PMC10810742; doi:10.1016/j.jbc.2023.105604), 2023-12-28

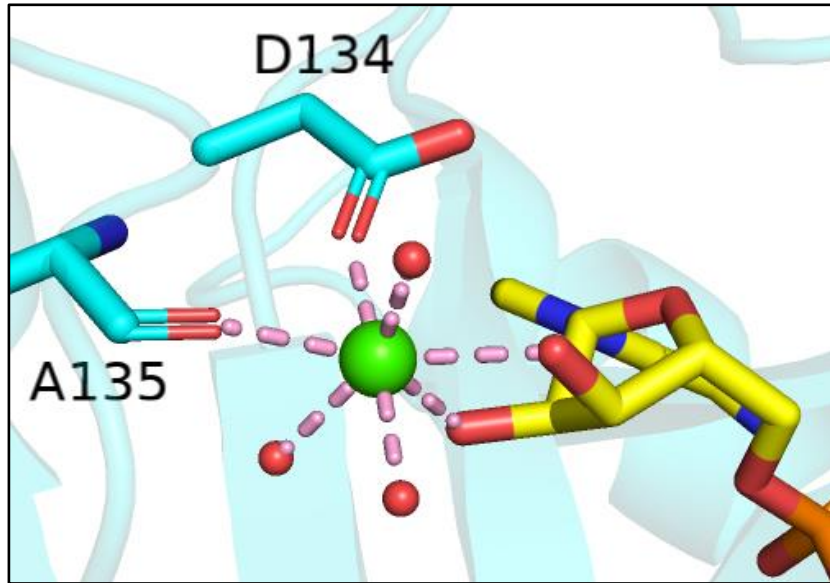

Supplement: mmc2.pdf [file mmc2.pdf]
